# Supplementary material for: Feature selection and causal analysis for microbiome studies in the presence of confounding using standardization
Source: PubMed Central journal article supplement (PMC8261956; doi:10.1186/s12859-021-04232-2), 2021-07-06
Supplement: 12859_2021_4232_MOESM1_ESM.pdf [file 12859_2021_4232_MOESM1_ESM.pdf]

Supplementary Material:  
Feature selection and causal analysis for microbiome studies in the presence  
of confounding using standardization

Emily Goren

May 2, 2021

## Contents

|                                                                           |          |
|---------------------------------------------------------------------------|----------|
| <b>S1 Additional simulation results</b>                                   | <b>2</b> |
| <b>S2 Real data analysis: correlation structure and assumption checks</b> | <b>9</b> |

## List of Tables

|                                                                            |   |
|----------------------------------------------------------------------------|---|
| S1 Simulation results: TPR and FPR, $n = 100$ , Poisson features . . . . . | 2 |
|----------------------------------------------------------------------------|---|

## List of Figures

|                                                                              |    |
|------------------------------------------------------------------------------|----|
| S1 Simulation results: AUC, $n = 50$ , Poisson features . . . . .            | 3  |
| S2 Simulation results: AUC, $n = 50$ , negative binomial features . . . . .  | 4  |
| S3 Simulation results: AUC, $n = 100$ , negative binomial features . . . . . | 5  |
| S4 Simulation results: FDP, $n = 50$ , Poisson features . . . . .            | 6  |
| S5 Simulation results: FDP, $n = 50$ , negative binomial features . . . . .  | 7  |
| S6 Simulation results: FDP, $n = 100$ , negative binomial features . . . . . | 8  |
| S7 Sorghum data: pairwise OTU correlations . . . . .                         | 9  |
| S8 Sorghum data: conditional residuals vs. predicted . . . . .               | 9  |
| S9 Sorghum data: conditional residual Q-Q plot . . . . .                     | 10 |



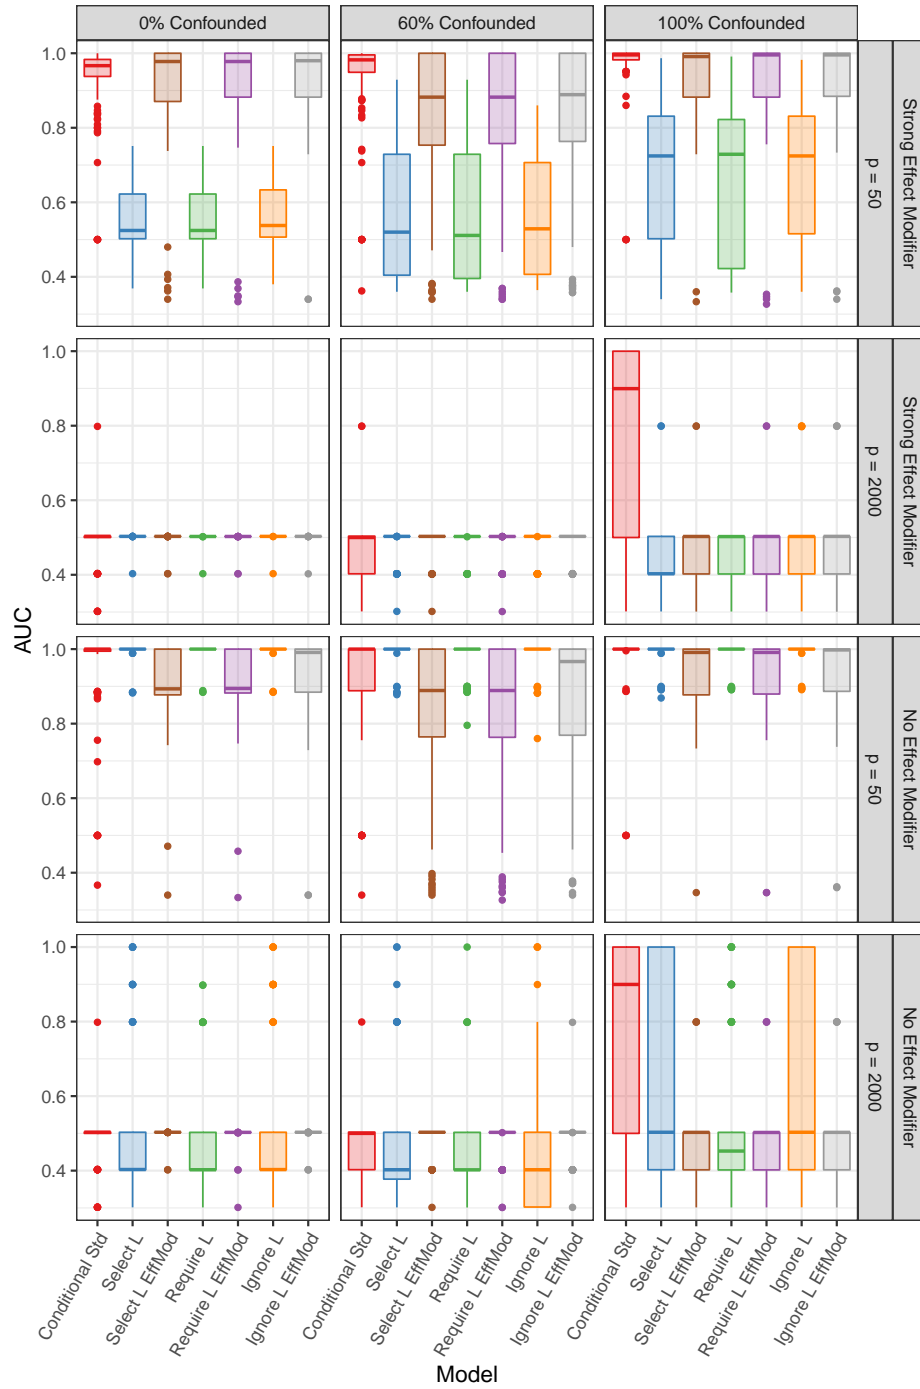

Figure S1: Simulation results: box plots of the area under the curve (AUC) from 100 simulation replications for  $n = 50$  and Poisson features using  $p$ -values based on the debiased LASSO estimate following iterative sure independence screening (iterative SIS).

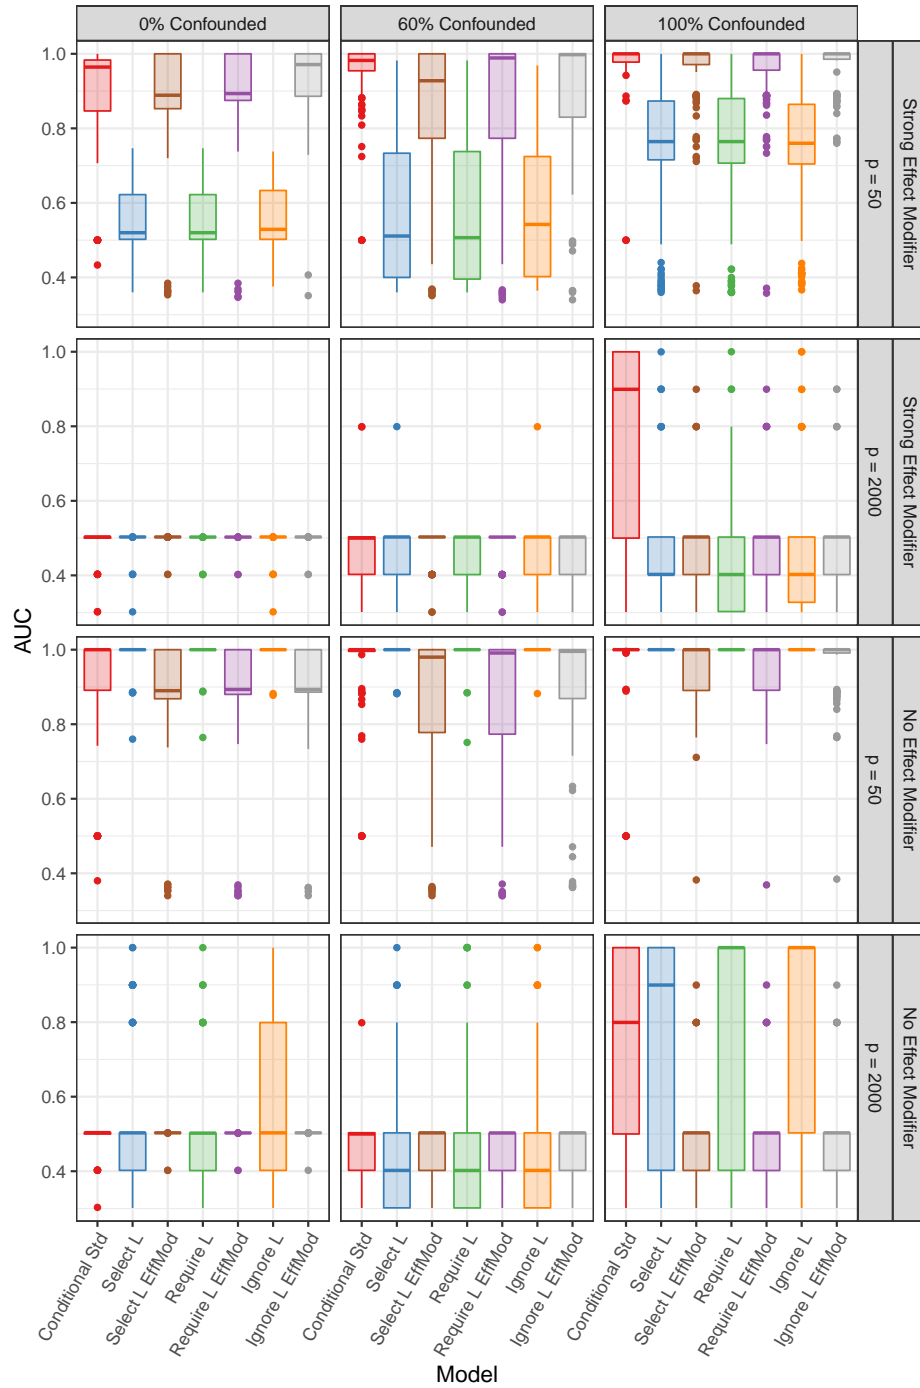

Figure S2: Simulation results: box plots of the area under the curve (AUC) from 100 simulation replications for  $n = 50$  and negative binomial features using  $p$ -values based on the debiased LASSO estimate following iterative sure independence screening (iterative SIS).

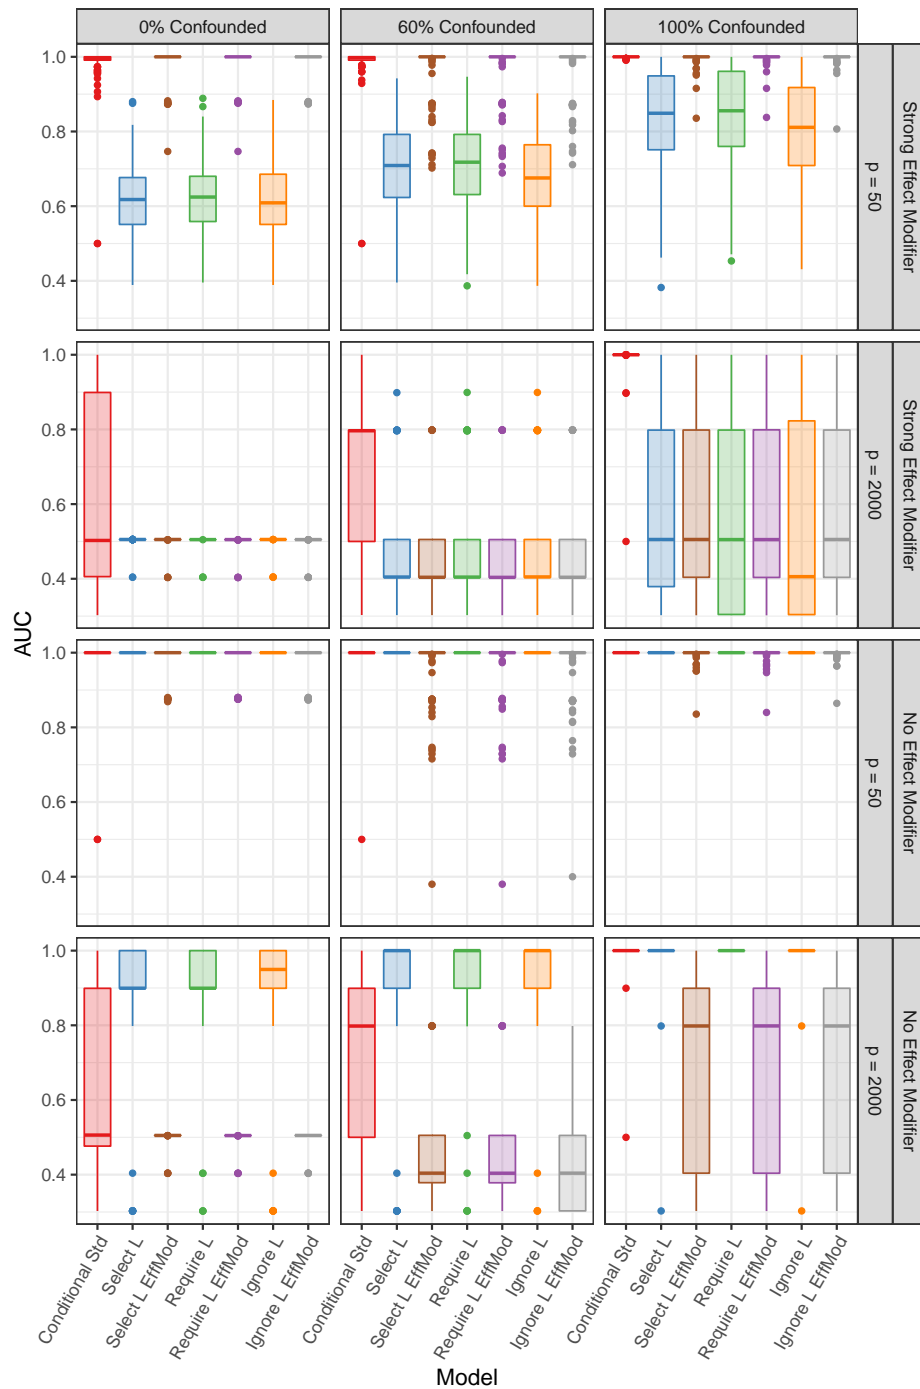

Figure S3: Simulation results: box plots of the area under the curve (AUC) from 100 simulation replications for  $n = 100$  and negative binomial features using  $p$ -values based on the debiased LASSO estimate following iterative sure independence screening (iterative SIS).

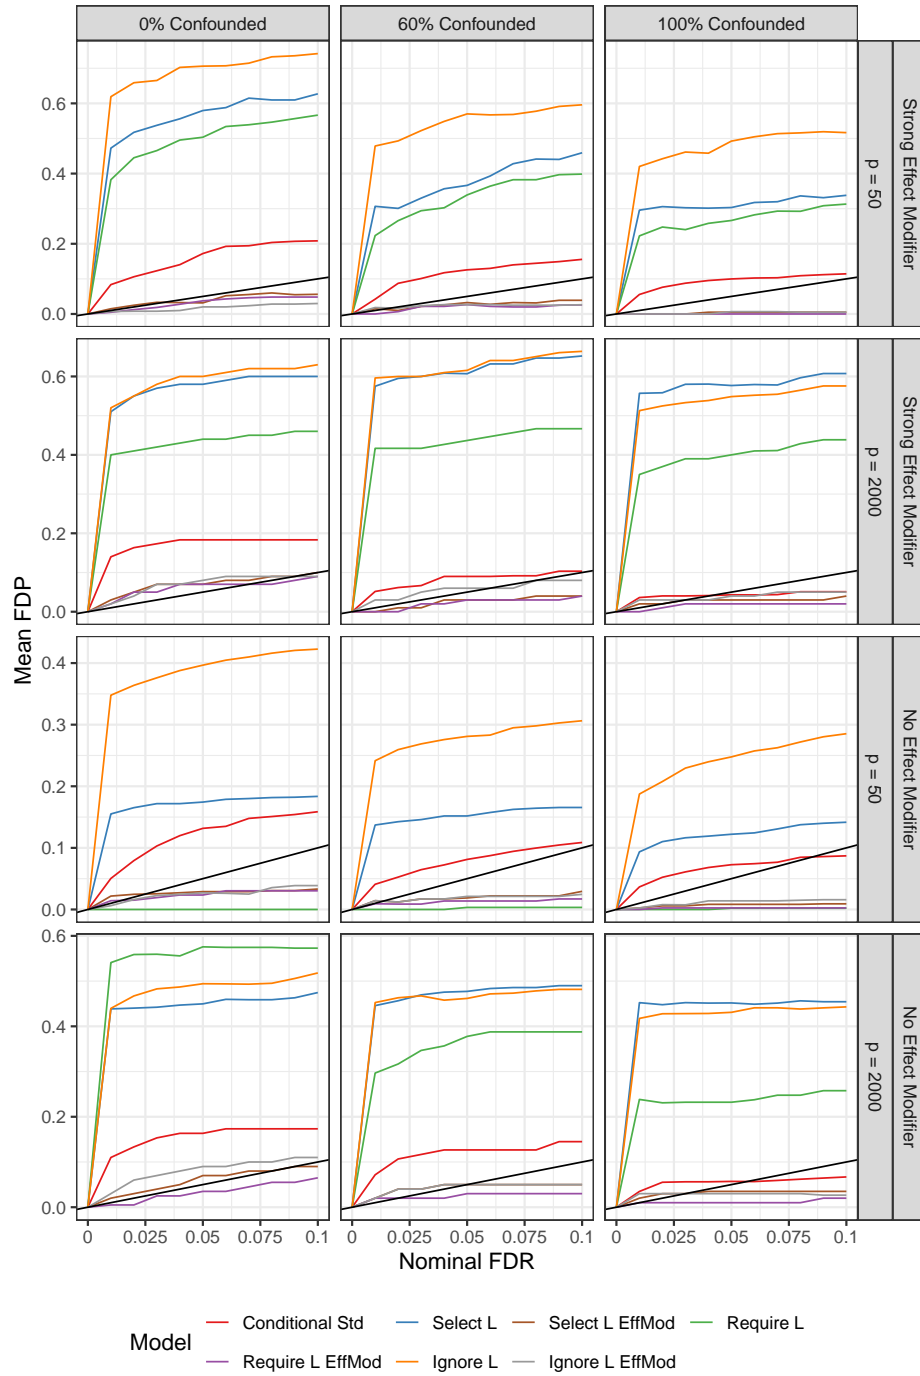

Figure S4: Simulation results: mean estimated false discovery proportion (FDP) for  $n = 50$  and Poisson features at varying nominal false discovery rate (FDR) values using Benjamini-Hochberg adjusted  $p$ -values based on the debiased LASSO estimate following iterative sure independence screening (iterative SIS). The  $y = x$  line is shown in black; any values above this line indicate lack of FDR control.

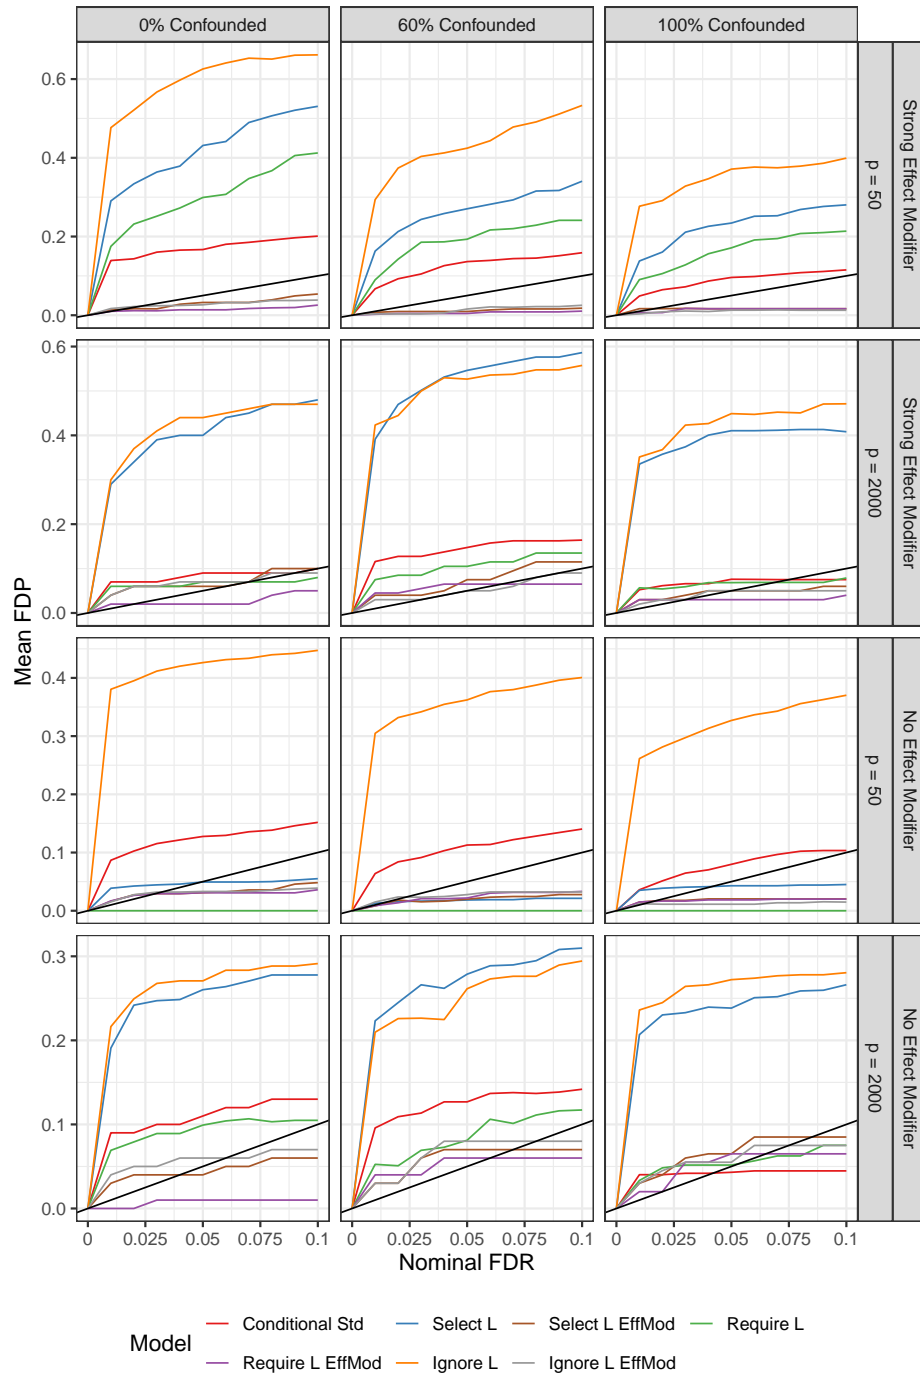

Figure S5: Simulation results: mean estimated false discovery proportion (FDP) for  $n = 50$  and negative binomial features at varying nominal false discovery rate (FDR) values using Benjamini-Hochberg adjusted  $p$ -values based on the debiased LASSO estimate following iterative sure independence screening (iterative SIS). The  $y = x$  line is shown in black; any values above this line indicate lack of FDR control.

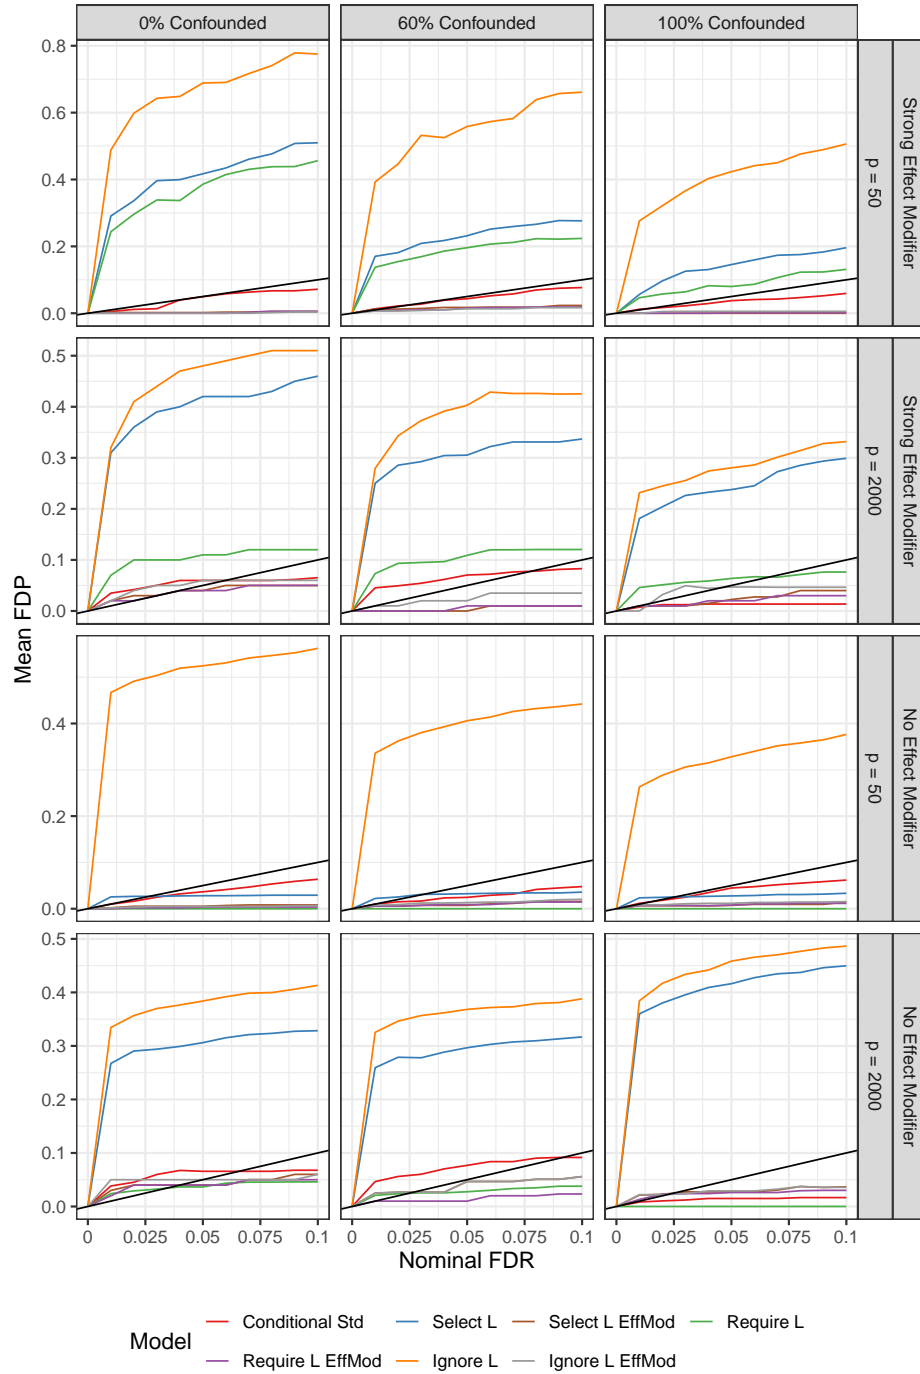

Figure S6: Simulation results: mean estimated false discovery proportion (FDP) for  $n = 100$  and negative binomial features at varying nominal false discovery rate (FDR) values using Benjamini-Hochberg adjusted  $p$ -values based on the debiased LASSO estimate following iterative sure independence screening (iterative SIS). The  $y = x$  line is shown in black; any values above this line indicate lack of FDR control.



## S2 Real data analysis: correlation structure and assumption checks

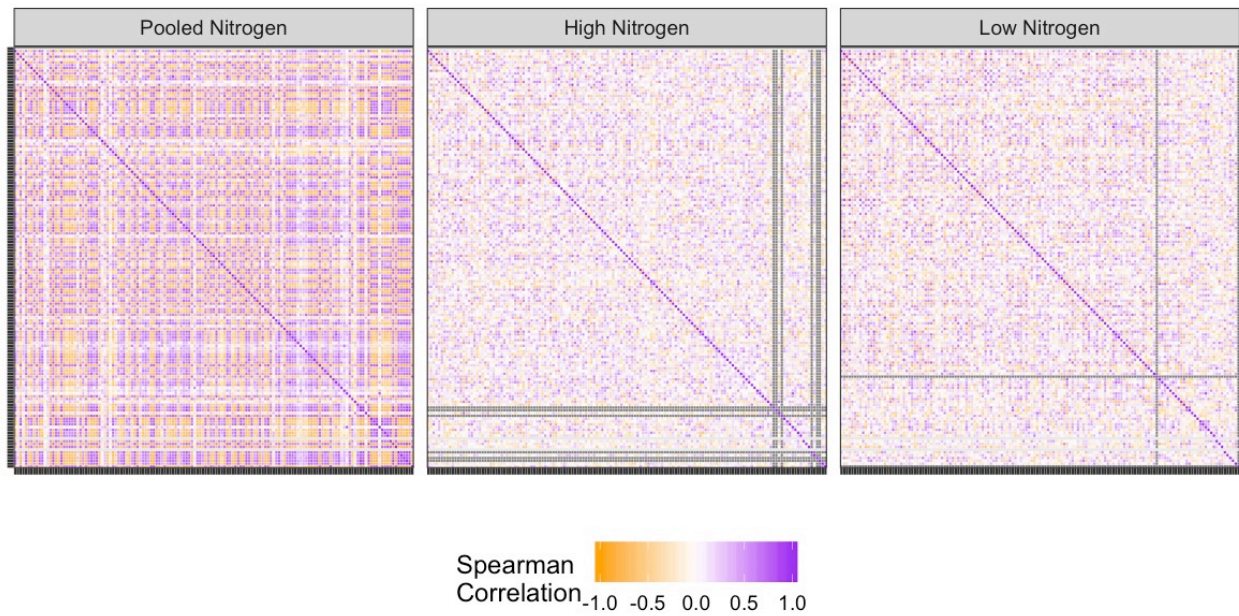

Figure S7: Sorghum microbiome data: Spearman's correlation between the top 150 marginally correlated OTUs for all samples, pooled across both nitrogen conditions (left) and stratified by nitrogen application (center and right).

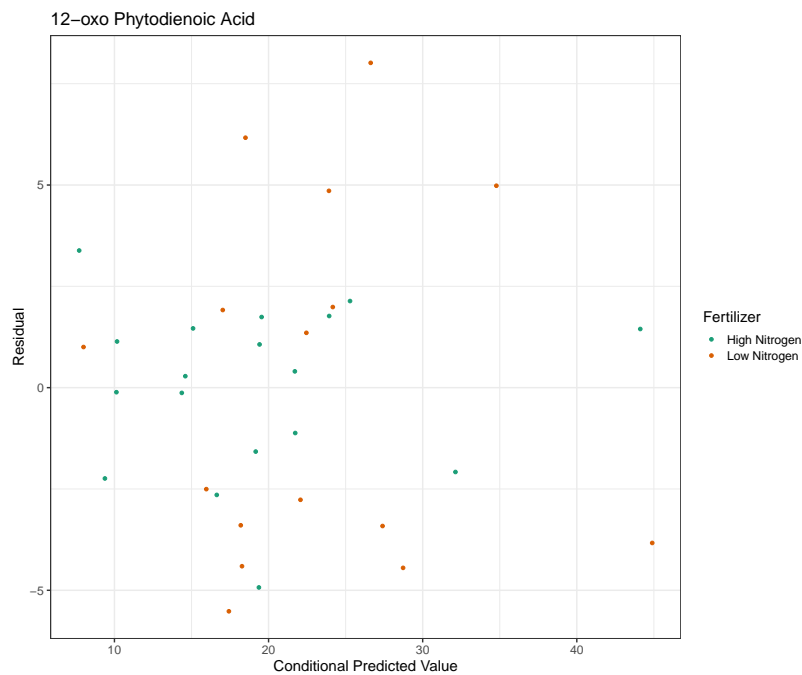

Figure S8: Real data analysis: residuals versus conditional (nitrogen stratum-specific) predicted values from the conditional debiased iterative SIS-LASSO estimates.

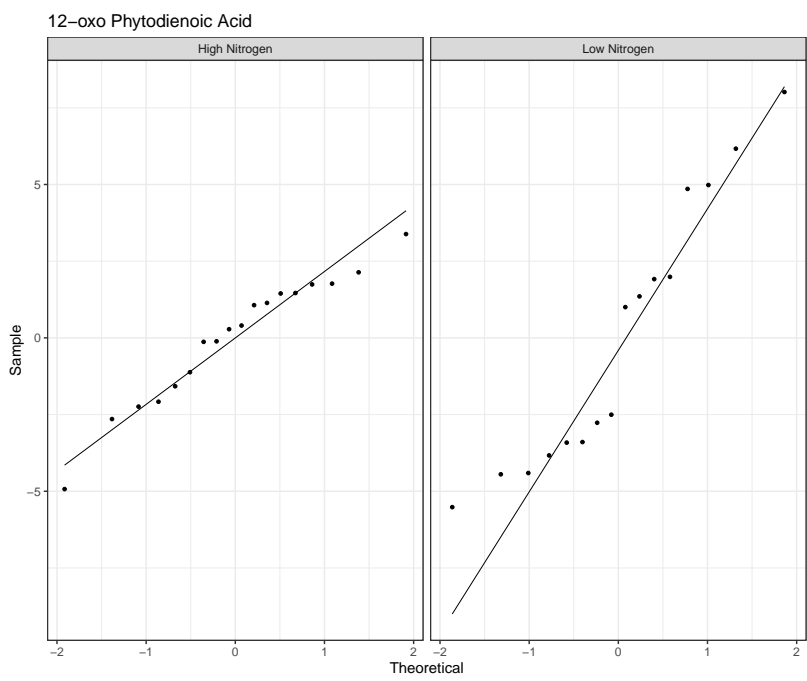

Figure S9: Real data analysis: Q-Q plot of residuals based on conditional (nitrogen stratum-specific) predicted values from the conditional debiased iterative SIS-LASSO estimates.
